1 **Improved performance of microbial fuel**  
2 **cells through addition of trehalose lipids**

3 **Peng Cheng** <sup>a,b,c,d,1</sup>, **Rui Shan** <sup>a,b,d,1</sup>, **Hao-Ran Yuan** <sup>a,b,d\*</sup>, **Ge Dong** <sup>a,e</sup>, **Li-fang Deng**  
4 <sup>a,b,d,e</sup>, **Yong Chen** <sup>a,b,d</sup>

5 <sup>a</sup> Guangzhou Institute of Energy Conversion, Chinese Academy of Sciences,  
6 Guangzhou 510640, China

7 <sup>b</sup> Key Laboratory of Renewable Energy, Chinese Academy of Sciences, Guangzhou  
8 510640, China

9 <sup>c</sup> University of Chinese Academy of Sciences, Beijing 100049, China

10 <sup>d</sup> Guangdong Key Laboratory of New and Renewable Energy Research and  
11 Development, Guangzhou 510640, China

12 <sup>e</sup> Nano Science and Technology Institute, University of Science & Technology of China,  
13 Suzhou 215123, China.

14 \*Corresponding authors.

15 Dr. H. R. Yuan, Tel.: +86 20 8704 8394; E-mail address: yuanhr@ms.giec.ac.cn.

16 <sup>1</sup> Both authors contributed equally to this work.

17

18

19

20

21

22

23 **Abstract:** Electron transfer from microorganisms to the electrode is the key process  
24 in microbial fuel cells (MFCs). In this study, a trehalose lipid was added to a  
25 *Rhodococcus pyridinivorans*-inoculated MFC to improve the power output by  
26 enhancing electron transfer. Upon trehalose lipid addition, the current density and  
27 maximum power density were increased by 1.83 times and 5.93 times, respectively.  
28 Cyclic voltammetry analysis revealed that the addition of trehalose lipid increased the  
29 electron transfer performance, while electrochemical impedance spectroscopy results  
30 proved a decrease in internal resistance. Microscopy images showed that the trehalose  
31 lipid-treated bacteria interacted more closely with various flagellum-like contacts,  
32 while in the pure trehalose lipid (200 mg/L), pores were obviously observed in the  
33 cell surface.

34 **Importance:** Improving the power output of microbial fuel cells by the addition of  
35 bio-surfactants have been proved to be a novel method. However, only rhamnolipid  
36 and sophorolipid are certified to be effective .Trehalose lipid is a common material in  
37 cosmetic and bio-medicine industry. Our research broaden the application of bio-  
38 surfactant in MFC and preliminarily explain the mechanism.

39

40 **Key words:** Microbial fuel cells; bio-surfactant; trehalose lipid; electron transfer;  
41 *Rhodococcus pyridinivorans*

42

43

44

45

46

47

48

49

50  
51  
52  
53  
54

## 55 **1. Introduction**

56 Microbial fuel cells (MFCs) are devices that can generate electricity from  
57 organic waste, and have drawn significant worldwide research attention (Santoro et  
58 al., 2017). Unlike conventional fuel cells, microorganisms act as catalysts on the MFC  
59 anode to convert chemical energy to electricity (Akinsemolu, 2018); the bacteria that  
60 can generate electricity are called exoelectrogens (Kumar et al., 2015). The bio-  
61 process for electricity production in an MFC with an air cathode occurs as follows: (1)  
62 the exoelectrogen on the anode oxidizes the substrate to produce electrons and  
63 protons, while microbial metabolism occurs in the cytoplasmic matrix; (2) electrons  
64 are shuttled to the anode surface from the bacteria; (3) subsequently, electrons  
65 gathered at the anode are conducted to the cathode passing through the external load;  
66 (4) the electrons and protons are combined with oxygen on the cathode to form  
67 water (Zhai et al., 2016, Sun et al., 2016).

68 The main shortcoming that restricts MFC application is the low power output  
69 compared to that of chemical fuel cells. The performance of the MFC significantly  
70 depends on the transfer rate from the microbes to the anode. Four mechanisms have  
71 been proposed for promoting electron transfer from the exoelectrogen to anode: (1)  
72 direct contact with the electrode to convert electrons through cytochrome (*Cyt c*) and

73 membrane bonding proteins (Yang et al., 2014); (2) electrically conductive flagellin-  
74 like nanowires (Lovley et al., 2015) (3) the use of electron shutters, a group of  
75 electrochemically active substances (Huang et al., 2016), (4) electro-kinesis, by which  
76 electrons are transferred to the electrode surface through a rapid wave of flagellin  
77 (Lian et al., 2016). Adding exogenous electron transfer mediators (ETMs) is  
78 traditionally used to enhance electron transfer (Szoelosi et al., 2015). However,  
79 exogenous mediators like ferricyanide and neutral red are expensive, unstable, and  
80 sometimes toxic to the microorganisms. Recent studies have found that specific  
81 exoelectrogens like *Pseudomonas aeruginosa* and *Geobacter sulfurreducens* can  
82 secrete small electrochemically active molecules to transfer electrons (Marsili et al.,  
83 2008; Bond et al., 2003). Because bacteria are covered by cell membranes and walls  
84 containing non-conductive materials like lipids and peptidoglycan, it is essential to  
85 investigate new approaches to the enhance power output by reducing electron  
86 resistance.

87 Recent research have substantiated that bio-surfactants can promote electricity  
88 generation in various exoelectrogens (Liu et al., 2012; Song et al., 2015). Moreover,  
89 bio-surfactants enhanced electron transfer through cell membranes, remarkably  
90 promoting the power output (Wen et al., 2011). The power density and power output  
91 were enhanced by 4× and 2.5×, respectively, by the addition of sophorolipid (Shen et  
92 al., 2014) and rhamnolipid (Zheng et al., 2015), respectively. However, *Pseudomonas*  
93 *aeruginosa* is the only pure strain confirmed in bio-surfactant application. To broaden  
94 the application of bio-surfactants in MFCs, it is necessary to discover additional

95 adaptable exoelectrogens applied in both detected bio-surfactants and effectual bio-  
96 surfactants.

97 Bio-surfactants are secondary metabolites of microorganisms with the advantage  
98 of good bio-compatibility. Sophorolipids and Rhamnolipids are the most frequently  
99 studied surfactants applied in MFCs. Sophorolipids can be synthesized by *Candida*  
100 *bombicola* (Konishi et al., 2008) while rhamnolipids are secreted by *Pseudomonas*  
101 *aeruginosa* (Soberón-Chávez G et al., 2005). Meanwhile, a glycolipid-based bio-  
102 surfactant of trehalose lipid with trehalose and carboxylic acid combined as the  
103 hydrophilic and hydrophobic groups, respectively, has drawn research attention  
104 (Khandelwal et al., 2018). The trehalose lipid is an important bio-surfactant in bio-  
105 medicine and cosmetics because of its moisture retention capacity and antibacterial  
106 properties (Zaragoza et al., 2013). Trehalose lipids and amber trehalose lipids can be  
107 synthesized by *Rhodococcus* bacteria (Philp et al., 2002; Tokumoto et al., 2009). The  
108 strain *Rhodococcus pyridinivorans*, which has been proved to be a promising  
109 exoelectrogen named HR-1, was separated and cultivated in our lab. The strain is  
110 orange-colored with round and smooth colonies, when observed under scanning  
111 electron microscopy (SEM) scans, the bacteria are rod-shaped with flagella on the  
112 surface. Hence, trehalose lipids were tested in an *R. pyridinivorans*-inoculated MFC  
113 to avert bactericidal effects.

114 Power generation was monitored to study the impact of trehalose lipid addition  
115 on the HR-1 inoculated MFC, cyclic voltammetry (CV) was conducted to investigate  
116 the electron transfer, electrochemical impedance spectroscopy (EIS) was performed to

117 measure the charge-transfer resistances and the surface morphology of the MFC

118 anode was observed by SEM.

## 119 **2. Materials and methods**

### 120 **2.1 MFC setup and operation**

121 A single-chamber air-cathode MFC was assembled from Plexiglas (5 cm × 5 cm  
122 × 5 cm, r = 2 cm, 50 mL available volume). Carbon cloth was placed in the anode as  
123 the electrode while a membrane cathode, assembled as described by Deng et al.,  
124 (2016), was loaded with platinum carbon powder dissolved in Nafion (Hesen,  
125 Shanghai). Titanium wire was placed between the anode and cathode to conduct  
126 electricity. The external resistance was set to 1000 Ω and the MFC was operated at  
127 30 °C in a constant-temperature incubator (Boxun BSC250, China). The logarithmic  
128 phase microbe was inoculated into the sterile MFC chamber as anode catalyst. 1 g/L  
129 sodium acetate with PBS was the initial anode substrate. As the output voltage  
130 dropped below 20 mV after each cycle, the anolyte was replaced with fresh medium.  
131 The voltage curves of different experiment groups were obtained after the output was  
132 repeatable for three cycles.

### 133 **2.2 Electrochemistry analysis and calculations**

134 The voltage output was monitored by a Keithley multichannel data acquisition  
135 instrument (2750, USA), with the electricity current calculated by  $I = U/R_{\text{ext}}$ . The  
136 current and power densities were normalized by the working area of the electrode. To

137 obtain a polarization curve, the external resistance  $R_{\text{ext}}$  was varied from 10 to 10000  $\Omega$   
138 by a slide rheostat and the voltage at each resistance was recorded after the output  
139 data had stabilized for 2 min.

140 CV was performed using an electrochemical workstation (CHI1010, Shanghai);  
141 the scan rate was 50 mV/s between - 0.8 V and 0.8 V. In order to avoid interference,  
142 vitamins were removed from the last fed anolyte of the MFC and the chamber was  
143 purged with pure filtered  $N_2$  for 15 min to eliminate  $O_2$ . During testing, the MFC  
144 anode was the working electrode, the MFC cathode was the counter electrode, and  
145 an Ag/AgCl (assumed +197 mV vs. standard hydrogen electrode) electrode (MF-  
146 2052, BAS) was the reference electrode. All CV tests were conducted at the same  
147 temperature and operation conditions (30  $^{\circ}\text{C}$ ) and scanning was repeated three times.

### 148 **2.3 SEM observation of exoelectrogen**

149 The bacteria were single-celled soft-structured organisms; it was thus essential to  
150 pretreat the sample by the critical point drying method (Xiao et al., 2015). The anode  
151 membrane was fixed by 2.5 % glutaraldehyde for 4 h, before the sample was washed  
152 with 0.1 mol/L phosphate-buffered saline (PBS) for four to six times and then  
153 dehydrated by different concentrations of alcohol of 30, 50, 70, 90 and 100%. Finally,  
154 the dehydrated anode membrane was replaced by *tert*-butyl alcohol (TBA).

155

156

157

158

159

160

### 161 **3. Results and discussion**

#### 162 **3.1 Improved electricity generation by trehalose lipid addition**

163 The voltage data of the single-chamber air-cathode MFC with and without  
164 trehalose lipid were recorded. As shown in Fig. 1a, the voltage is significantly  
165 enhanced by the addition of trehalose lipid at concentrations below 20 mg/L; the  
166 maximum voltage is obtained with the addition of 20 mg/L bio-surfactant. At the  
167 trehalose lipid levels of 5, 10 and 20 mg, the voltages are 1.3×, 1.4× and 1.8× higher  
168 than those of the control group (0 mg), respectively. However, the voltage curve  
169 shows a decrease in the high-concentration experiment group. With the addition of 40  
170 mg/L and 60 mg/L bio-surfactant, the voltage outputs are reduced by 20 mV and 45  
171 mV, respectively. The glycolipid surfactant was similar to the membrane glycoprotein;  
172 therefore, according to the principle of similar phase dissolution, the proper addition  
173 of trehalose lipid may helped to increase membrane permeability, which resulted in  
174 electron transfer enhancement. The adverse effects of trehalose lipid on *R.*  
175 *pyridinivorans* MFC were originally expected to act on the bacteria membranes. In  
176 other words, the proper concentration of trehalose lipid increased membrane  
177 permeability, which enhanced electron transfer, while a high concentration of bio-  
178 surfactant harmed the bacteria's integrality, which reduced the metabolism. Shown in



179 Fig. 1b is a comparison between the untreated MFC and 20 mg/L-treated MFC  
180 regarding voltage and power densities. At the same fixed external resistance of 1000  
181  $\Omega$ , with the addition of optimal bio-surfactant, the MFC shows the maximum power  
182 density of 0.25 mW/cm<sup>2</sup>, which is 3.3× that of the untreated MFC (0.075 mW/cm<sup>2</sup>).  
183 Meanwhile, bio-surfactants can reduce surface tension and retain moisture; these  
184 features are confirmed by the treated MFC reaching its maximum voltage earlier than  
185 the control, which possibly indicates microorganism biofilm formation on the anode  
186 in the initial phase.

187

188 Polarization curves and power density measurements obtained by varying the  
189 external resistance were used to investigate the effect of trehalose lipid on the  
190 electricity generation in the MFC. Shown in Fig. 1c are the polarization curves of 1  
191 g/L acetate, pure PBS, 1 g/L acetate with 20 mg/L bio-surfactant, and pure bio-  
192 surfactant. With the addition of pure PBS or trehalose lipid, the MFC can generate  
193 only negligible electricity. The results also show that neither PBS solution nor  
194 trehalose lipid is an electron donor for electricity generation. However, with trehalose  
195 lipid addition, the power density shows a much higher polarization in the MFC,  
196 indicating better energy conversion efficiency compared to that of the control  
197 (Srikanth et al., 2012). In the control group without bio-surfactant, the MFC shows  
198 the maximum power density of 0.0049 mW/cm<sup>2</sup> at the current density of 0.035  
199 mA/cm<sup>2</sup>; with the addition of 20 mg/L trehalose lipid, the maximum power density of  
200 0.033 mW/cm<sup>2</sup> is obtained at the current density of 0.128 mA/cm<sup>2</sup>, which is 6.7×  
201 higher than of the control. Meanwhile, the maximum current density is increased from

202 0.044 mA/cm<sup>2</sup> to 0.148 mA/cm<sup>2</sup>, indicating a decrease in electron transfer resistance  
203 under the effect of the bio-surfactant (Yong et al., 2013). According to Ohm's law, the  
204 internal resistance can be calculated by the linear area of the polarization curve. The  
205 estimated internal resistance with the trehalose lipid addition is 366 Ω, which is only  
206 43 % of that of the untreated MFC (852 Ω). The results reveal that, through the  
207 addition of trehalose lipid, the charge-transfer resistance is significantly reduced,  
208 suggesting that the power output and energy conversion efficiency are enhanced by  
209 the bio-surfactant addition.

210 The electrode potential was measured to evaluate the effect of trehalose lipid on  
211 the anode and cathode of the MFC. Shown in Fig. 1d are the electrode potentials with  
212 the current density of the MFC operated under different concentrations of trehalose  
213 lipid addition (0, 5, 10, and 20 mg/L). With bio-surfactant addition, both the anode  
214 and cathode potentials are obviously increased compared to those of the control  
215 group. The bio-surfactant can reduce surface resistance, which benefits oxygen  
216 infusion and bacteria growth (Wen et al. 2010). Moreover, at the current density of  
217 0.059 mA/cm<sup>2</sup>, the anode potentials are 149, 227, and 284 mV and the cathode  
218 potentials are 88, 108, and 118 mV with trehalose additions of 5, 10, and 20 mg/L,  
219 respectively. However, as the concentration of trehalose lipid is increased, the cathode  
220 potential does not change significantly compared to the anode potential with the  
221 increase of the current density. The effect of the bio-surfactant on the electrode  
222 potential promoted the power output of the MFC. Moreover, the results of the  
223 polarization curves and anode potential indicate that the anode performance under

224 trehalose lipid addition is mainly responsible for the overall power generation.

### 225 **3.2 Electrochemical performance with trehalose lipid**

226 CV was performed to examine the electrochemically active substances during  
227 electron transfer at a stable MFC output voltage (Mohanakrishna et al., 2018). Shown  
228 in Fig. 2a are the CV curves of MFCs with different concentrations of trehalose lipid.  
229 It is obvious that the redox pair peaks are centered at  $-0.36$  V and  $-0.28$  V. The peak  
230 currents are enhanced as the addition is increased, indicating that the trehalose lipid  
231 can promote the electrochemical activity of the MFC. At the addition of 20 mg/L bio-  
232 surfactant, the peak current is 0.93 mA, three times higher than that of the initial  
233 MFC. Fig. 2b and Fig. 2c show comparisons between 1 g/L acetate-fed MFC and the  
234 pure trehalose lipid addition and between pure PBS anolyte with and without bio-  
235 surfactant addition, respectively. It is obvious that no distinct peaks are formed during  
236 the CV scans in the pure bio-surfactant group and in the pure PBS anolyte without  
237 trehalose lipid addition, which implies that the trehalose lipid has no electrochemical  
238 activity and cannot serve as an electron donor for the MFC. This result excludes the  
239 possibility of acting on the bacteria metabolism by impacting the chemical oxygen  
240 demand (COD) and illustrates that the addition of trehalose lipid to the MFC  
241 positively affects electron transfer on the anode.

242 To further investigate the impact of the bio-surfactant on the MFC, EIS was  
243 performed to measure the charge-transfer resistance. Fig. 2d shows the impedance  
244 spectra for anodes with different substrates. Unlike the experimental group with

245 acetate, that with pure trehalose lipid has a relatively high resistance. The CV results  
246 showed that the trehalose lipid did not act as an electron donor, which decreased the  
247 electron concentration and thus increased the internal resistance. Nevertheless, the  
248 experimental groups with different concentrations of bio-surfactant show decreases in  
249 the internal charge transfer; the variation tendencies agree with the CV results. Based  
250 on the Nyquist plots of the EIS curves, the internal resistance of the MFC with 20  
251 mg/L trehalose lipid addition is only 56% that of the untreated MFC. The charge-  
252 transfer resistance analysis was similar to the polarization linear calculation, verifying  
253 the conjecture that the trehalose lipid affected bacteria at the anode to enhance  
254 electron transfer, which promoted the power output.

### 255 **3.3 Effect of trehalose lipid on bacteria surface**

256 Previous studies have illustrated that through surfactant addition, anodic bacteria  
257 attachment was enhanced (Zhang et al., 2017). However, bacteria were perforated  
258 when treated with cationic reagents (Liu et al., 2012). In this experiment, the MFC  
259 power output was promoted when the MFC bacteria were treated with trehalose lipid  
260 at the concentration of 20 mg/L, while the output was restricted at higher-  
261 concentration additions of the bio-surfactant. SEM observation was conducted to  
262 determine the adverse results.

263 Fig.3a shows the surface morphology of the carbon cloth before inoculation; the  
264 carbon cloth is smooth without any impurities. When treated with the electron donor  
265 and inoculated with *R. pyridinivorans* sp. strain HR-1, the successfully initiated MFC

266 anode is shown to bear numerous bacteria (Fig. 3c). The bacteria are rod-shaped with  
267 smooth surfaces and gathered on the anode surface (Fig. 3f). In contrast, the surface  
268 of the MFC anode with 20 mg/L trehalose lipid is more diversified; the bacteria are  
269 more plump and interconnected by flagella-like substances (Fig. 3b and Fig. 3e). The  
270 microorganism increases in volume if the inner osmotic pressure is decreased; the  
271 osmotic pressure decrease may be caused by pore formation upon bio-surfactant  
272 addition (Yates et al., 2012). In the meantime, the trehalose lipid surfactant lowers the  
273 surface tension and enhances contact between bacteria. The pore formation conjecture  
274 is proved by Fig. 3d, where obvious pores are observed on the bacteria surfaces. The  
275 surface morphology with pure trehalose lipid addition is more like the anode with  
276 attached bacteria and no bio-surfactant addition, which agrees with the power  
277 generation results and electrochemical analysis. The plumped bacteria and their  
278 surface connections both promote electron transfer, while the pure trehalose lipid-  
279 treated MFC and untreated MFC have higher internal resistances. In conclusion, pores  
280 formed by the bio-surfactant can act as shutter channels to enhance electron transfer  
281 from the cytoplasm to the extracellular domain, but high surfactant concentrations can  
282 break the cell structure, which can lead to metabolism weakening.

283

284

285

286

287

## 288 **Conclusion**

289 In this study, the addition of a bio-surfactant (trehalose lipid) for improving  
290 power production and reducing the resistance in a *Rhodococcus pyridinivorans* sp.  
291 strain HR-1 MFC was successful performed. With the addition of 20 mg/L trehalose  
292 lipid, the maximum power density of 1 g/L acetate-fed MFC was increased from 0.05  
293 mW/cm<sup>2</sup> to 0.3 mW/cm<sup>2</sup> (a six-fold enhancement). Pores were observed on the  
294 bacteria surfaces and resulted in improvements in the open-circuit voltage and power  
295 density of the MFC. This study confirmed that the addition of bio-surfactants to  
296 MFCs could enhance bioelectricity generation.

## 297 **Acknowledgements**

298 We gratefully acknowledge financial support from the National Natural Science  
299 Foundation of China (51406207 and 51676194), Scientific Research Equipment  
300 Development Project of Chinese Academy of Sciences (YZ201516), Science and  
301 Technology Project of Guangdong Province, China (2016201604030077), and the  
302 Science and Technology Project of Guangdong Province, China (2016A010105017).

303

304

305

306

307

## 308 **References**

- 309 Akinsemolu A. A., 2018. The role of microorganisms in achieving the sustainable development  
310 goals. *J. Clean. Prod.* 182, 139-155.
- 311 Bond D.R., Lovley D.R., 2003. Electricity production by *Geobacter sulfurreducens* attached to  
312 electrodes. *Appl. Environ. Microb.* 69, 1548-1555.
- 313 Deng L.-F., Yuan H.-R., Cai X.-X., Ruan Y.-Y., Zhou S.-G., Chen Y., Yuan Y., 2016.  
314 Honeycomblike hierarchical carbon derived from livestock sewage sludge as oxygen reduction  
315 reaction catalysts in microbial fuel cells. *Int. J. Hydrogen. Energ.* 41, 22328-22336.
- 316 Huang J.-G., Zhou R.-B., Chen J.-J., Han W., 2016. Volatile fatty acids produced by co-fermentation  
317 of waste activated sludge and henna plant biomass. *Bioresour. Technol.* 211, 80-86.
- 318 Khandelwal A., Vijay A., Dixit A., Chhabra M., 2018. Microbial fuel cell powered  
319 by lipid extracted algae: A promising system for algal lipids and power generation. *Bioresour.*  
320 *Technol.* 247, 520-527.
- 321 Konishi M., Morita T., Kitamoto D., 2008. Production of new types of sophorolipids by *Candida*  
322 *batistae*. *Oleo. Sci.* 57, 359-369.
- 323 Kumar R., Singh L., Wahid Z.A., Din M.F., 2015. Exoelectrogens in microbial fuel cells toward  
324 bioelectricity generation: a review. *Int. J. Energ. Res.* 39, 1048-1067.
- 325 Lian Y.-L., Yang Y.-G., Guo J., Wang Y., 2016. Electron acceptor redox potential globally regulates  
326 transcriptomic profiling in *Shewanella decolorationis* S12. *Sci. Rep.* 6, 31143.
- 327 Liu J., Qiao Y., Guo C.-X., Lim S., Song H., Li C.-M. 2012. Graphene/carbon cloth anode for high-  
328 performance mediator-less microbial fuel cells. *Bioresour. Technol.* 114, 275-280.
- 329 Liu J., Qiao Y., Lu Z.-S., Song H., Li C.-M., 2012. Enhance electron transfer and performance of

- 330 microbial fuel cells by perforating the cell membrane. *Electrochem. Commun.* 15, 50-53.
- 331 Marsili E., Baron D. B., Shikhar I. D., Coursolle D., Gralnick J. A., Bond D.R., 2008. *Shewanella*  
332 secretes flavins that mediate extracellular electron transfer. *PNAS.* 105, 3968-3974.
- 333 Mohanakrishna G., Abu-Reesh I.M., Kondaveeti S., Al-Raoush R.I., He Z., 2018. Enhanced  
334 treatment of petroleum refinery wastewater by short-term applied voltage in single chamber  
335 microbial fuel cell. *Bioresour. Technol.* 253, 16-21.
- 336 Lovley D.R., Malvankar N.S., 2015. Seeing is believing: novel imaging techniques help clarify  
337 microbial nanowire structure and function. *Environ. Microbiol.* 17, 2209-2215.
- 338 Philp J.-C., Kuyukina M.-S., Ivshina L.-B., 2002. Alkanotrophic *Rhodococcus ruber* as a  
339 biosurfactant producer. *Appl. Microbiol. Biotechnol.* 59, 318-324.
- 340 Santoro.C., Arbizzani.C., Erable.B., Ieropoulos.I., 2017. Microbial fuel cells: From fundamentals  
341 to applications. A review. *J. Power. Source.* 356, 225-244.
- 342 Shen H.-B., Yong X.-Y., Chen Y.-L., Liao Z.-H., 2014. Enhanced bioelectricity generation by  
343 improving pyocyanin production and membrane permeability through sophorolipid addition in  
344 *Pseudomonas aeruginosa*-inoculated microbial fuel cells. *Bioresour. Technol.* 167, 490-494.
- 345 Soberón-Chávez G., Lépine F., Déziel E., 2005. Production of rhamnolipids by *Pseudomonas*  
346 *aeruginosa*. *Appl. Microbiol. Biotechnol.* 68, 718-725.
- 347 Song Y.-C., Kim D.S., Woo J.H., Subha B., Jang S.H., Sivakumar S., 2015. Effect of surface  
348 modification of anode with surfactant on the performance of microbial fuel cell. *Int. J. Energ. Res.*  
349 39, 860-868.
- 350 Sun M., Zhai L.-F., Li W.-W., Yu H.-Q., 2016. Harvest and utilization of chemical energy in wastes  
351 by microbial fuel cells. *Chem. Soc. Rev.* 45, 2847-2870.



- 352 Szoelosi A., Rezessy S., Judit M., Hoschke A., 2015. Novel method for screening microbes for  
353 application in microbial fuel cell. *Bioresour. Technol.* 179, 123-127.
- 354 Tokumoto Y., Nomura N., Uchiyama H., 2009. Structural characterization and surface-active  
355 properties of a succinoyl trehalose lipid produce by *Rhodococcus* sp. SD-74. *Oleo. Sci.* 58, 97-102.
- 356 Wen Q., Kong F.-Y., Zheng H.-T., Cao D.-X., 2011. Electricity generation from synthetic penicillin  
357 wastewater in an air-cathode single chamber microbial fuel cell. *Chem. Eng. J.* 168, 572-576.
- 358 Wen Q., Kong F.-Y., Zheng H.-T., Yin J.-L., 2010. Simultaneous processes of electricity generation  
359 and ceftriaxone sodium degradation in an air-cathode single chamber microbial fuel cell. *J. Power*  
360 *Source.* 196, 2567-2572.
- 361 Xiao Y., Li T.-T., Zhou F., Zuo Y.-X., 2015. Cryo-scanning electron microscopy and its application  
362 in the research of life science. *J. Chin. Elec. Microsc. Soc.* 34, 447-451.
- 363 Yang Y.-G., Xiang Y.-B., Xia C.-Y., Wu W.-M., Sun G.-P., Xu M.-Y., 2014. Physiological and  
364 electrochemical effects of different electron acceptors on bacterial anode respiration in  
365 bioelectrochemical systems. *Bioresour. Technol.* 164, 270-275.
- 366 Yates M.D., Kiely P.D., Call D.F., Rismani Y.H., 2012. Convergent development of anodic bacterial  
367 communities in microbial fuel cells. *Isme. J.* 11, 2002-2013.
- 368 Yong Y.-C., Cai Z., Yu Y.-Y., Chen P., 2013. Increase of riboflavin biosynthesis underlies  
369 enhancement of extracellular electron transfer of *Shewanella* in alkaline microbial fuel cells.  
370 *Bioresour. Technol.* 130, 763-768.
- 371 Zaragoza A., Teruel J. A., Aranda F. J., Ortiz A., 2013. Interaction of a trehalose lipid biosurfactant  
372 produced by *Rhodococcus erythropolis* 51T7 with a secretory phospholipase A (2).  
373 *J. COLLOID. INTERF. SCI.* 408, 132-137.

374 Zhai D.-D., Li B., Sun J.-Z., Sun D.-Z., 2016. Enhanced power production

375 from microbial fuel cells with high cell density culture. *Water. Sci. Technol.* 73, 2176-2181.

376 Zhang P., Liu J., Qu Y.-P., Feng Y.-J., 2017. Enhanced *Shewanella oneidensis* MR-1 anode

377 performance by adding fumarate in microbial fuel cell. *Chem. Eng. J.* 328, 697-702.

378 Zheng T., Xu Y.-S., 2015. Endogenously enhanced biosurfactant production promotes electricity

379 generation from microbial fuel cells. *Bioresour. Technol.* 197, 416-421.

380

381

382

383

384

385

386

387

388

389

390

391

392

393

394

## 395 **Figure Captions**

396 Figure 1. A. Voltage output of the *R. pyridinivorans* sp. strain HR-1-inoculated MFC under  
397 different concentrations of trehalose lipid of 0, 5, 10, 20, 40, and 60 mg/L; B. Voltage and power  
398 density comparison between untreated and 20 mg/L bio-surfactant-treated MFCs; C. Polarization  
399 curves of the MFC with only 1 g/L acetate, 1 g/L acetate with 20 mg/L trehalose lipid, pure  
400 trehalose lipid anolyte, and pure PBS.; D. Electrode potential of the MFC under trehalose lipid  
401 addition at concentrations of 0, 5, 10, and 20 mg/L.

402

403 Figure 2. A. CV analysis of MFC at stable output voltage under different concentrations of  
404 trehalose lipid addition. The bio-surfactant concentrations are 0, 5, 10, and 20 mg/L; B. CV  
405 analysis of pure trehalose lipid anolyte on turnover phase; C. CV peak comparison of 20 mg/L  
406 trehalose lipid-treated and untreated MFCs; D. EIS analysis of the MFC anode with different  
407 substrates.

408

409 Figure 3. Surface morphology of anode under different treatments. A. Blank carbon cloth; B.  
410 *R. pyridinivorans* sp. strain HR-1-inoculated MFC anode with 1 g/L acetate and 20 mg/L trehalose  
411 lipid; C. Untreated MFC anode surface; D. Pure trehalose lipid anolyte-treated MFC anode; E. *R.*  
412 *pyridinivorans* sp. strain HR-1 inoculated MFC anode with 1 g/L acetate and 20 mg/L trehalose  
413 lipid; F. Untreated MFC anode surface.

414

415

416 **Tables and Figures**

417

418

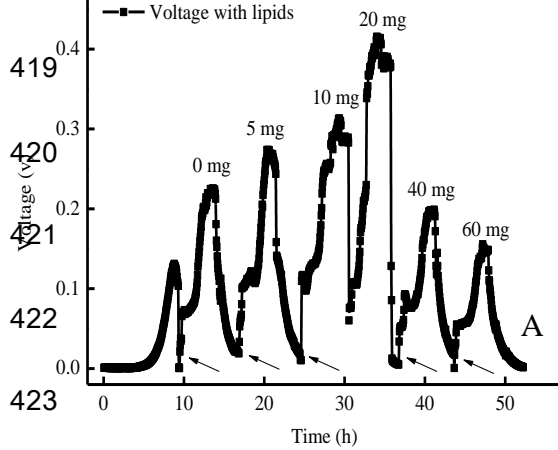

419

420

421

422

423

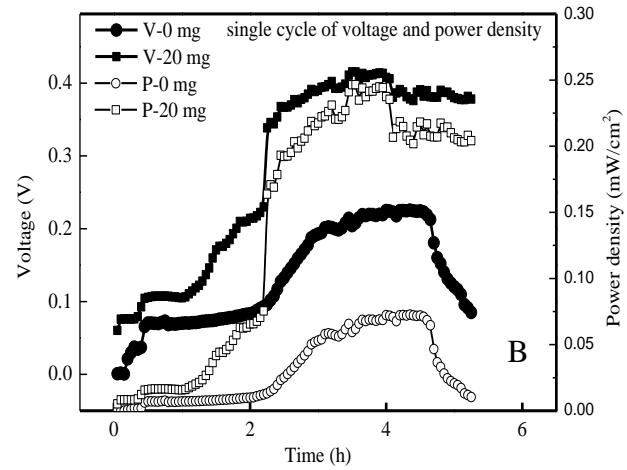

424

425

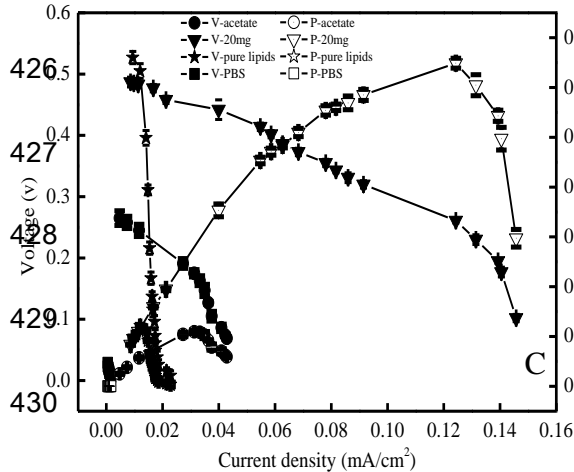

426

427

428

429

430

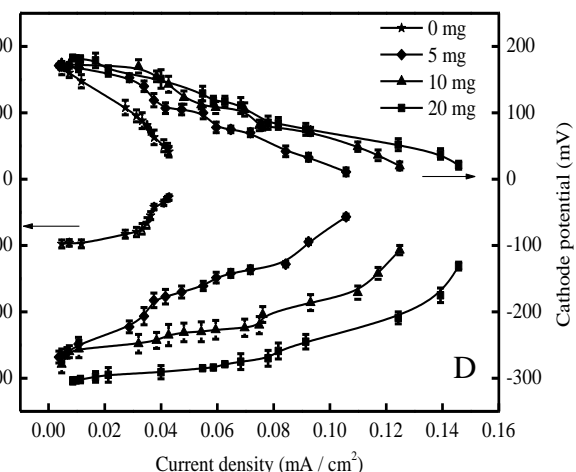

431

432 Figure 1. A. Voltage output of the *R. pyridinivorans* sp. strain HR-1-inoculated MFC under  
 433 different concentrations of trehalose lipid of 0, 5, 10, 20, 40, and 60 mg/L; B. Voltage and  
 434 power density comparison between untreated and 20 mg/L bio-surfactant-treated MFCs; C. Polarization  
 435 curves of the MFC with only 1 g/L acetate, 1 g/L acetate with 20 mg/L trehalose lipid, pure  
 436 trehalose lipid anolyte, and pure PBS.; D Electrode potential of the MFC under trehalose lipid  
 437 addition at concentrations of 0, 5, 10, and 20 mg/L.

438

439

440

441

442

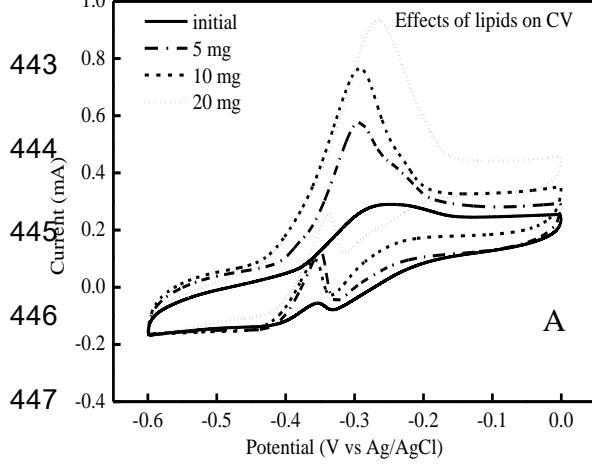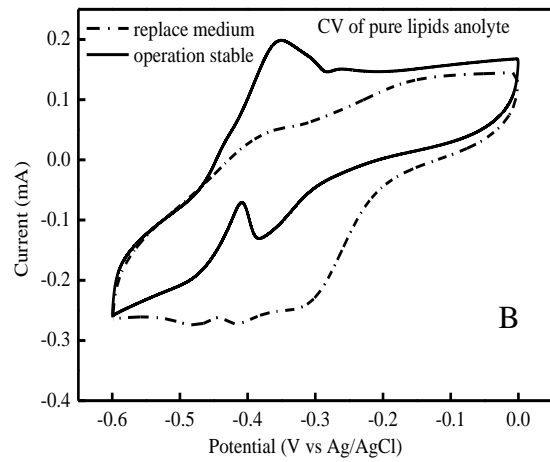

448

449

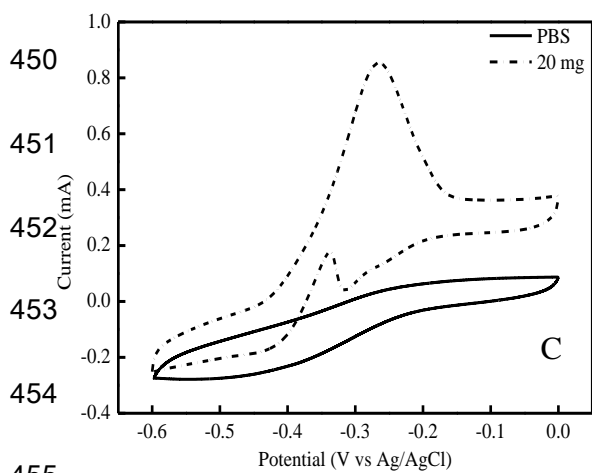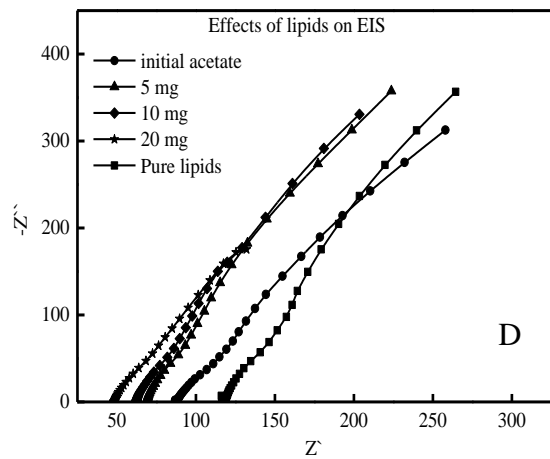

455

456 Figure 2. A. CV analysis of MFC at stable output voltage under different concentrations of  
457 trehalose lipid addition. The bio-surfactant concentrations are 0, 5, 10, and 20 mg/L; B. CV  
458 analysis of pure trehalose lipid anolyte on turnover phase; C. CV peak comparison of 20 mg/L  
459 trehalose lipid-treated and untreated MFCs; D. EIS analysis of the MFC anode with different  
460 substrates.

461

462

463

464

465

466

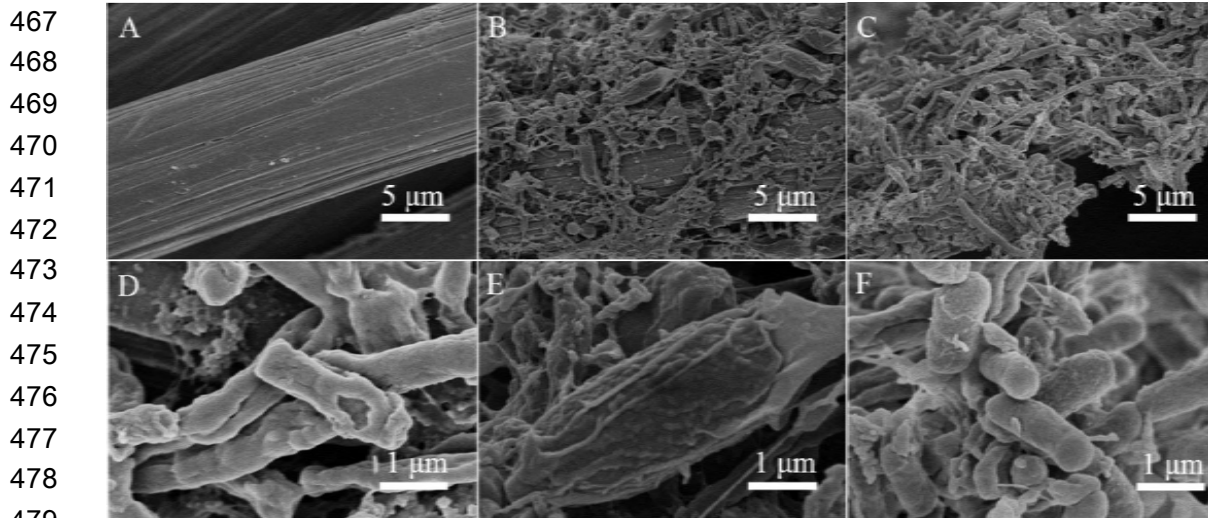

480

481 Figure 3. Surface morphology of anode under different treatments. A. Blank carbon cloth; B. *R.*  
482 *pyridinivorans* sp. strain HR-1-inoculated MFC anode with 1 g/L acetate and 20 mg/L trehalose  
483 lipid; C. Untreated MFC anode surface; D. Pure trehalose lipid anolyte-treated MFC anode; E. *R.*  
484 *pyridinivorans* sp. strain HR-1 inoculated MFC anode with 1 g/L acetate and 20 mg/L trehalose  
485 lipid; F. Untreated MFC anode surface.

486

487

488

489

490

491

492

493

494

495

496 **Highlights**

497 1. Trehalose lipid enhanced MFC power generation

498 2. Trehalose lipid decrease MFC internal resistance

499 3. Pores were observed with the addition of trehalose lipid

500 4. Addition of bio-surfactant is a promising way to increase MFC performance

501
